# Supplementary material for: Regulating the electronic and spin structure of endohedral metallofullerenes: a case investigation of Sc3N@C80 and Sc3C2@C80
Source: Royal Society of Chemistry journal article supplement (doi:10.1039/d2dt02816f), 2022-01-01
Supplement: d2dt02816f1.pdf [file d2dt02816f1.pdf]

## Supporting Information

### **Regulating the electronic and spin structure of endohedral metallofullerene: A case investigation on $\text{Sc}_3\text{N}@C_{80}$ and $\text{Sc}_3\text{C}_2@C_{80}$**

Yongqiang Feng,<sup>\*a</sup> Yuzhu Hu,<sup>a</sup> Tianmi Luo,<sup>a</sup> Chengke Yuan,<sup>a</sup> Wenjie Zhu,<sup>a</sup> Mengting Gao<sup>a</sup> and Xuemeng Huo<sup>a</sup>

<sup>a</sup> School of Materials Science and Engineering, Shaanxi Key Laboratory of Green Preparation and Functionalization for Inorganic Materials, Shaanxi University of Science and Technology, Xi'an, 710021, China

\* Correspondence: fengyq@sust.edu.cn

## Additional Figures

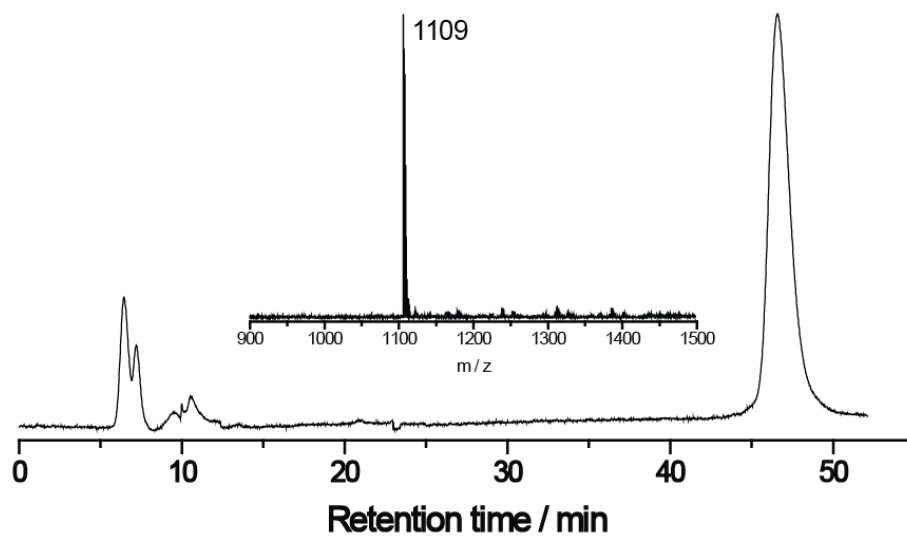

Figure S1. HPLC profile of the purified Sc<sub>3</sub>N@C<sub>80</sub>. Conditions: Buckyprep column (ø 20 mm × 250 mm), 12 mL min<sup>-1</sup> toluene flow, 310 nm detection wavelength. Inset: MALDI-TOF mass spectroscopy of Sc<sub>3</sub>N@C<sub>80</sub>.

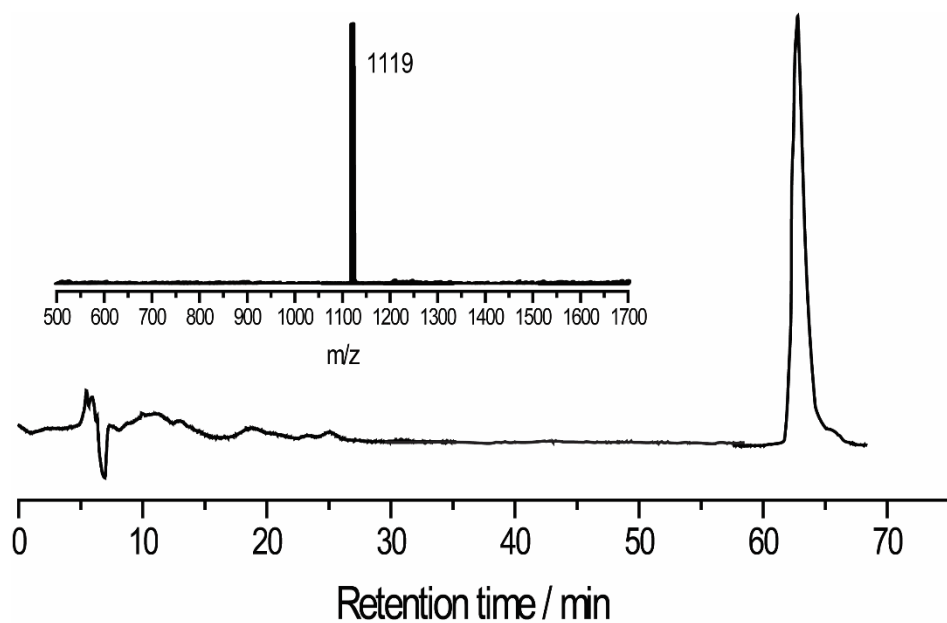

Figure S2. HPLC profile of the purified Sc<sub>3</sub>C<sub>2</sub>@C<sub>80</sub>. Conditions: Buckyprep column ( $\varnothing$  20×250 mm), 12 mL min<sup>-1</sup> toluene flow, 310 nm detection wavelength. Inset: MALDI-TOF mass spectroscopy of Sc<sub>3</sub>C<sub>2</sub>@C<sub>80</sub>.

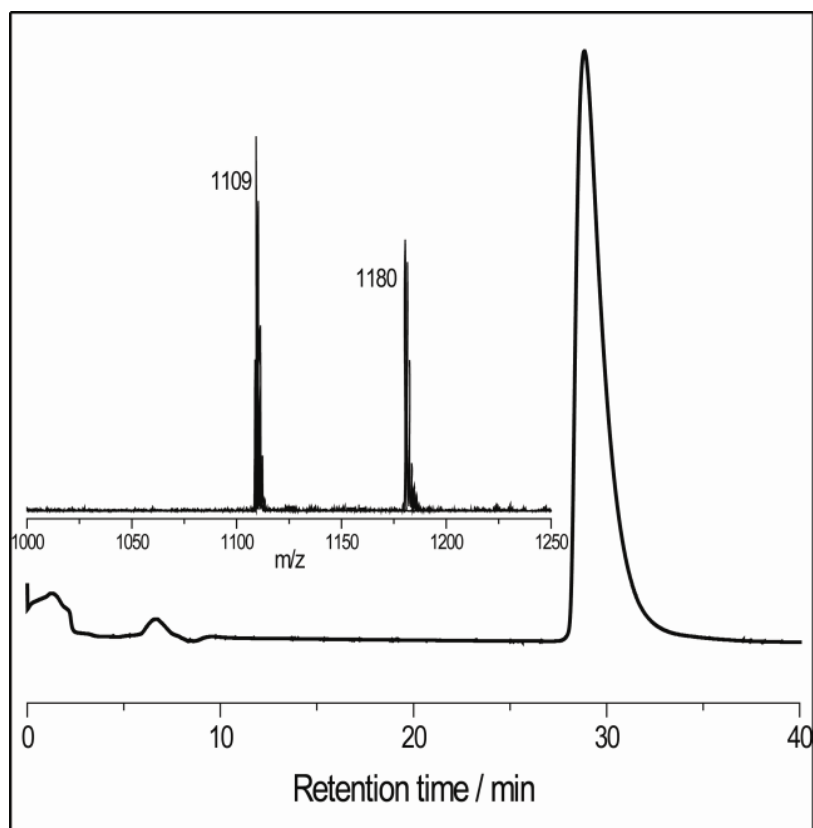

Figure S3. HPLC profile of monoadduct of Sc<sub>3</sub>N@C<sub>80</sub>-Gly. Conditions: Buckyprep-M column ( $\varnothing$  20×250 mm), 12 mL min<sup>-1</sup> toluene flow, 310 nm detection wavelength. Inset: MALDI-TOF mass spectroscopy of Sc<sub>3</sub>N@C<sub>80</sub>-Gly.

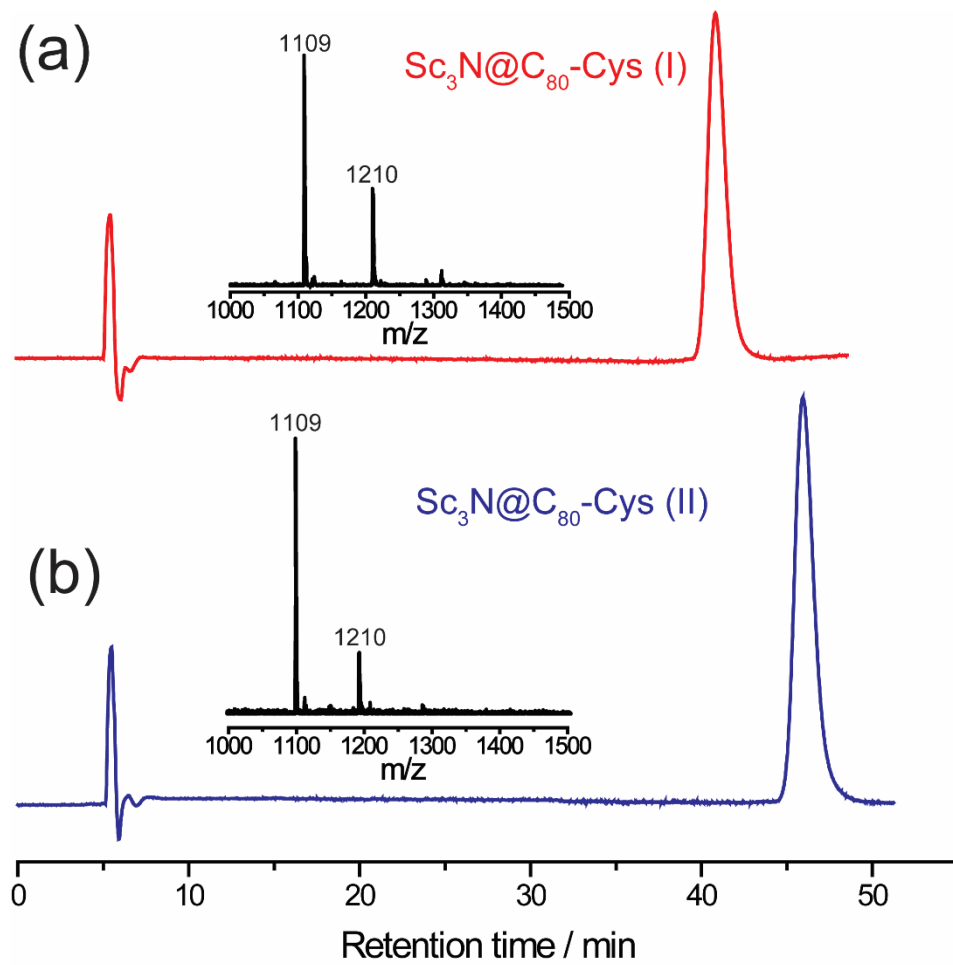

Figure S4. HPLC profiles of purified (a)  $\text{Sc}_3\text{N}@C_{80}\text{-Cys}$  (I) and (b)  $\text{Sc}_3\text{N}@C_{80}\text{-Cys}$  (II), inset showing the corresponding MALDI-TOF-MS data.

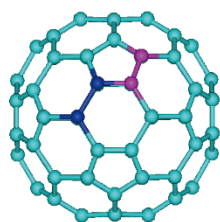

Symmetry of  $I_h$ - $C_{80}$  cage

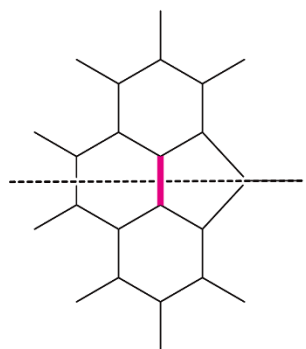

5,6 ring junction

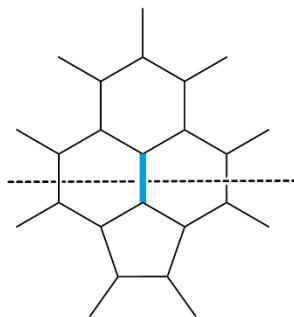

6,6 ring junction

Figure S5. Two addition sites on the  $I_h$ - $C_{80}$  carbon cage.

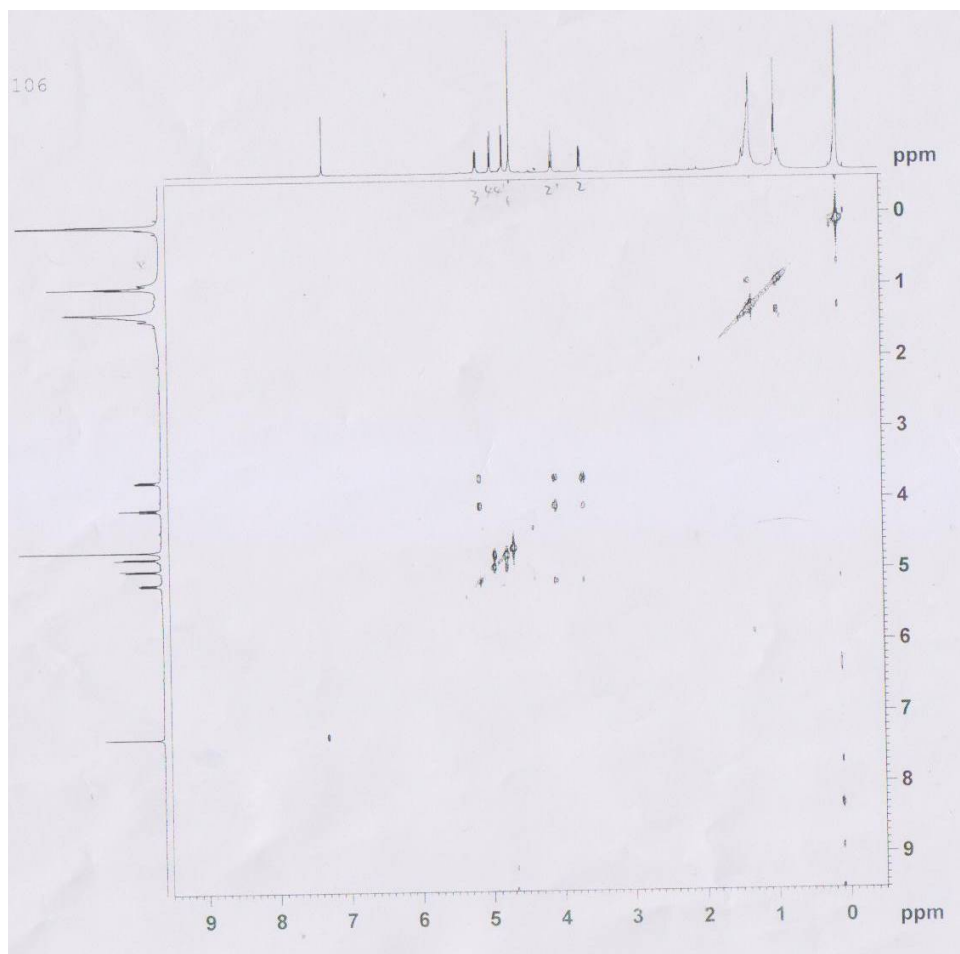

Figure S6. COSY spectrum of  $\text{Sc}_3\text{N}@C_{80}\text{-Cys (I)}$  measured in  $\text{CDCl}_3$  solution at 298 K.

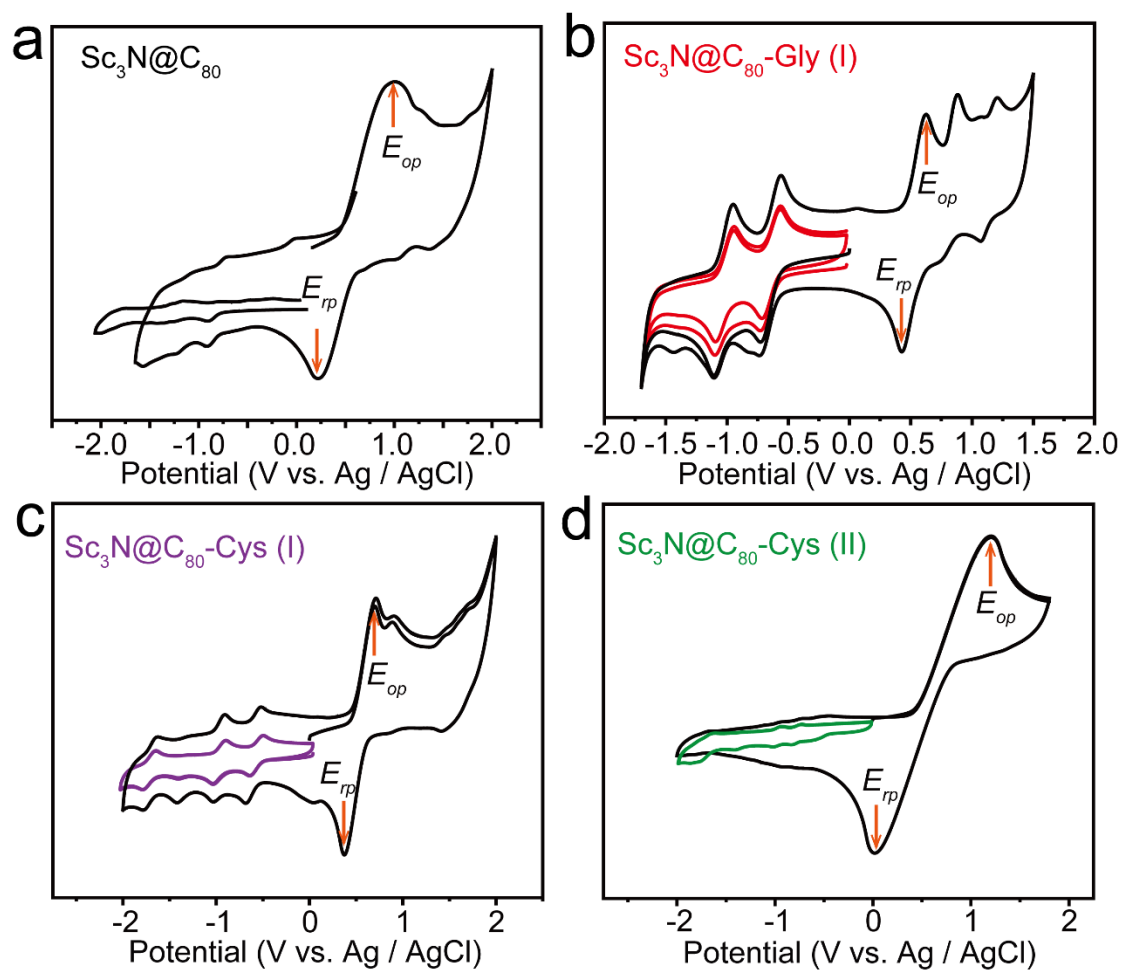



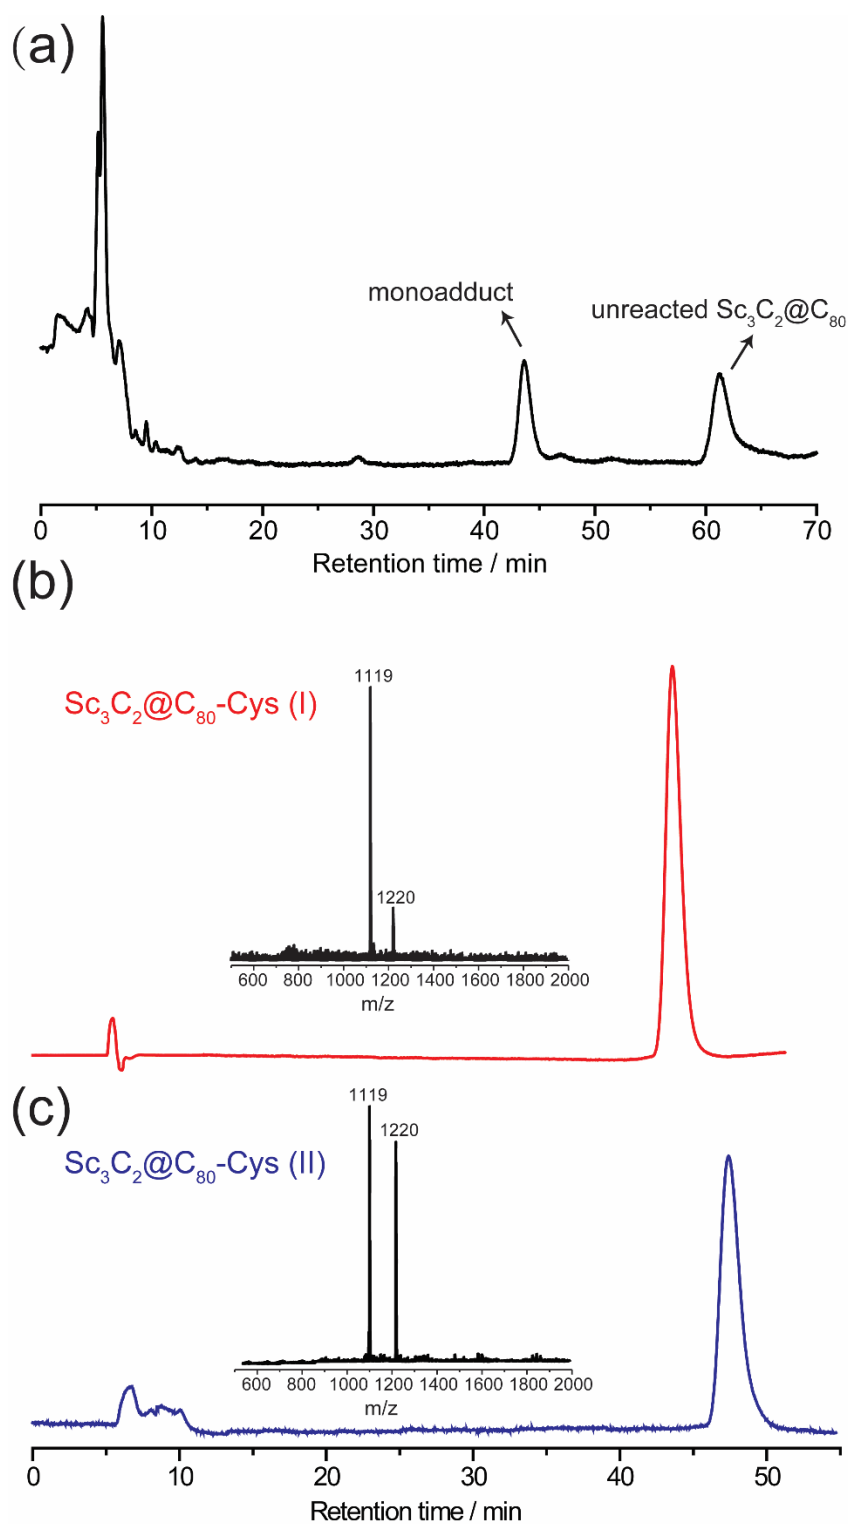

Figure S8. (a) HPLC profile showing the separation process of the crude mixture of the Prato reaction of  $\text{Sc}_3\text{C}_2@C_{80}$ . HPLC profile of purified monoadduct of (b)  $\text{Sc}_3\text{C}_2@C_{80}$ -Cys (I) and (c)  $\text{Sc}_3\text{C}_2@C_{80}$ -Cys (II), inset: the corresponding MALDI-TOF mass spectroscopy. Conditions: Buckyprep column ( $\varnothing$  20 $\times$ 250 mm), 12 mL  $\text{min}^{-1}$  toluene flow, 310 nm detection wavelength.

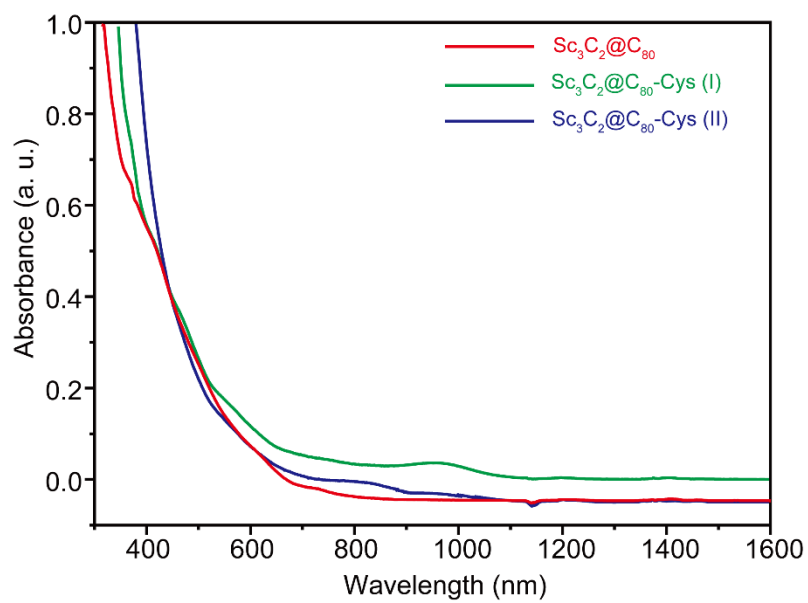

Figure S9. UV-vis-NIR spectra of  $\text{Sc}_3\text{C}_2@\text{C}_{80}$ ,  $\text{Sc}_3\text{C}_2@\text{C}_{80}\text{-Cys (I)}$  and  $\text{Sc}_3\text{C}_2@\text{C}_{80}\text{-Cys (II)}$ .
